# Supplementary material
Source: Royal Society of Chemistry journal article supplement (doi:10.1039/d6tc01082b)
Supplement: d6tc01082b1.pdf [file d6tc01082b1.pdf]

## Supplementary Information

**Lattice engineering mediated fast decay in  $\text{Li}_2\text{HfF}_6:\text{Mn}^{4+}$  with dual-excitation-band responsive differential emission for fingerprinting, anti-counterfeiting, and optical signal transmission**

Ping Yue,<sup>a</sup> Ke Chang,<sup>\*a</sup> Zhiyu Qin,<sup>a</sup> Wanjie Ding,<sup>a</sup> Yue Zhao,<sup>a</sup> Langping Dong,<sup>a</sup> Yufeng Liu,<sup>a</sup>

Haijie Chen,<sup>\*b</sup> Yongzheng Fang<sup>\*a</sup> and Jingshan Hou<sup>\*a</sup>

<sup>a</sup>Faculty of Materials Technology, Shanghai Institute of Technology, Shanghai, 201418, China.

Email: chang\_ke@sjtu.edu.cn; fangyongzheng@sit.edu.cn; houjingshan@sit.edu.cn.

<sup>b</sup>State Key Laboratory of Advanced Fiber Materials, College of Materials Science and Engineering, Donghua University, Shanghai, 201620, China.

Email:

haijie.chen@dhu.edu.cn.

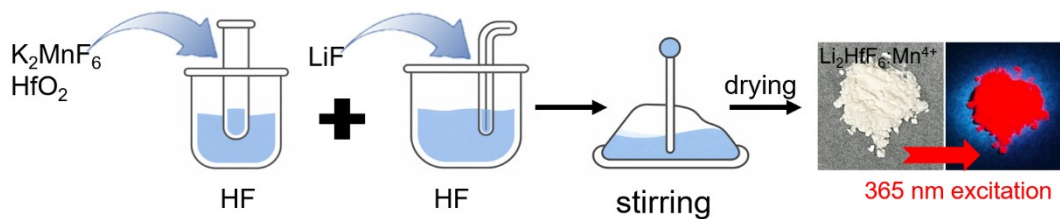

**Figure S1.** Schematic diagram of the synthesis of LHM red phosphor via co-precipitation method.

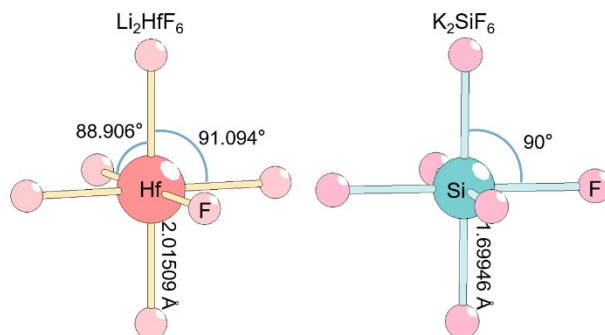

**Figure S2.** Ball-and-stick models of the  $\text{HfF}_6$  and  $\text{SiF}_6$  octahedra in  $\text{Li}_2\text{HfF}_6$  (left) and  $\text{K}_2\text{SiF}_6$  (right).

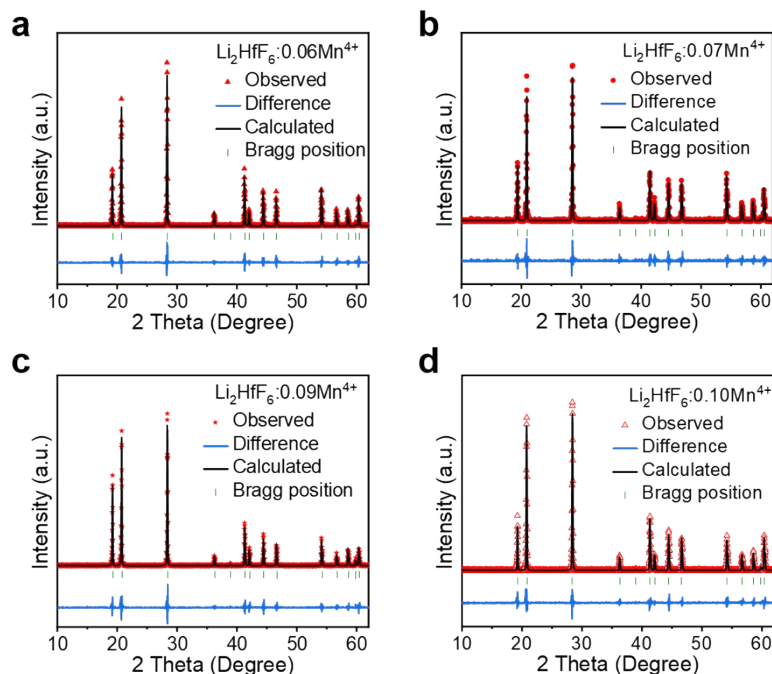

**Figure S3.** Rietveld refinement result of  $\text{Li}_2\text{HfF}_6:x\text{Mn}^{4+}$  ( $x = 0.06, 0.07, 0.09, 0.10$ ).

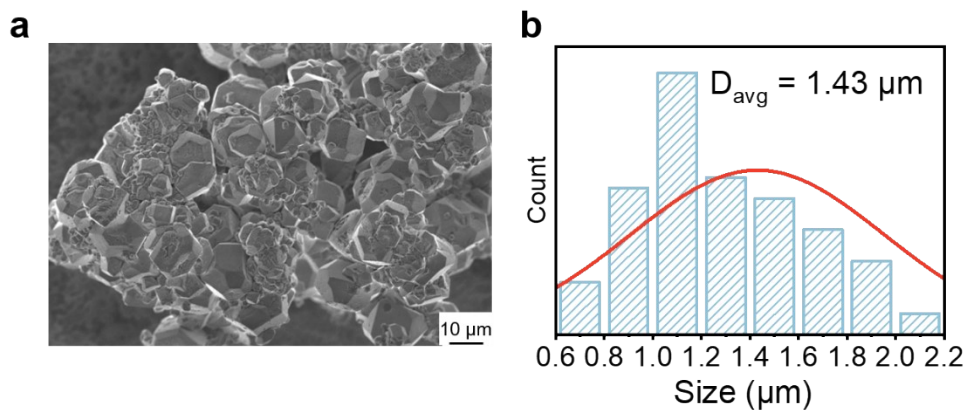

**Figure S4.** (a) SEM image and (b) Particle size distribution histogram of  $\text{Li}_2\text{HfF}_6:0.08\text{Mn}^{4+}$  samples.

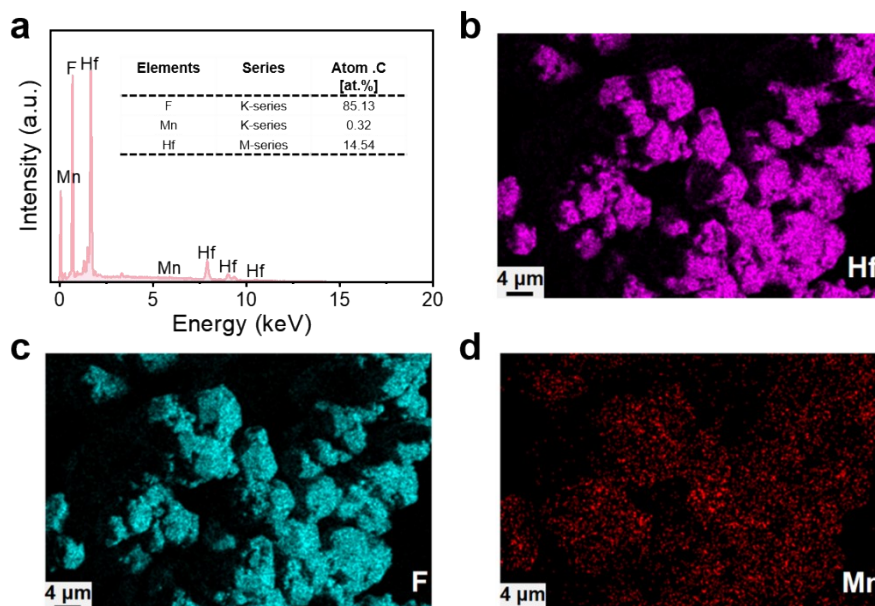

**Figure S5.** (a) EDS characterization of  $\text{Li}_2\text{HfF}_6:0.08\text{Mn}^{4+}$  powder. (b-d) SEM elemental mapping.

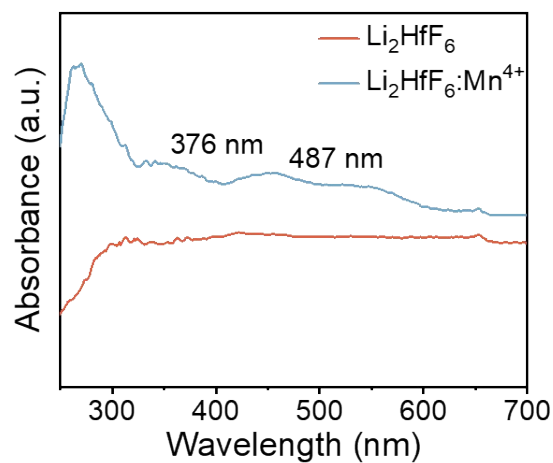

**Figure S6.** UV-vis absorption spectra of  $\text{Li}_2\text{HfF}_6$  host and  $\text{Li}_2\text{HfF}_6:\text{Mn}^{4+}$  phosphor.

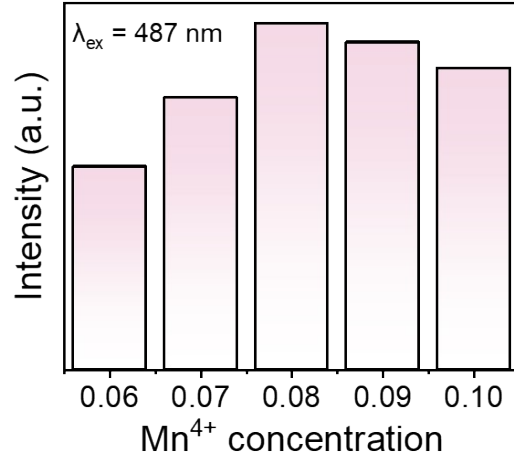

**Figure S7.** Comparison of luminescence intensity at 487 nm excitation wavelength for samples with different Mn<sup>4+</sup> doping concentrations (0.06-0.10).

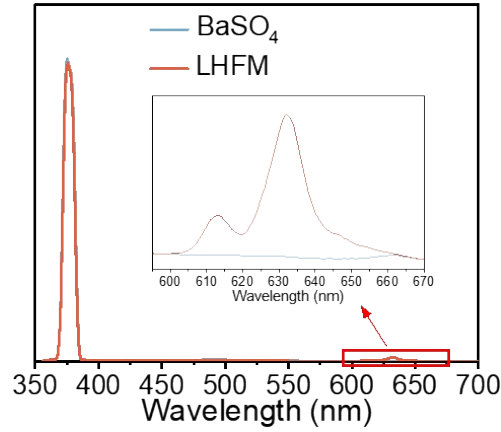

**Figure S8.** Quantum efficiency spectrum of LHFМ.

The quantum efficiency measurements were carried out using an Edinburgh FS5 fluorescence spectrometer equipped with an integrating sphere, where BaSO<sub>4</sub> was employed as the blank reference for baseline calibration. The absorption efficiency (AE), internal quantum efficiency (IQE), and external quantum efficiency (EQE) were calculated according to the following equations:

$$AE = \frac{\int \lambda[E(\lambda) - R(\lambda)]d\lambda}{\int \lambda E(\lambda)d\lambda} \quad (S1)$$

$$IQE = \frac{\int \lambda P(\lambda)d\lambda}{\int \lambda E(\lambda)d\lambda} \quad (S2)$$

$$EQE = IQE \times AE = \frac{\int \lambda P(\lambda)d\lambda}{\int \lambda E(\lambda)d\lambda} \quad (S3)$$

where  $E(\lambda)/h\nu$ ,  $R(\lambda)/h\nu$ , and  $P(\lambda)/h\nu$  represent the numbers of photons in the excitation, reflectance, and emission spectra, respectively. Based on these calculations, the IQE of LHFМ was determined to be 55.5%, while the absorption efficiency was measured to be 3.89%, corresponding to an EQE of 2.16%. It should be noted that the relatively low EQE mainly originates from the weak absorption characteristic of the spin-forbidden d-d transitions of Mn<sup>4+</sup> ions in fluoride hosts, which limits the overall photon harvesting efficiency.

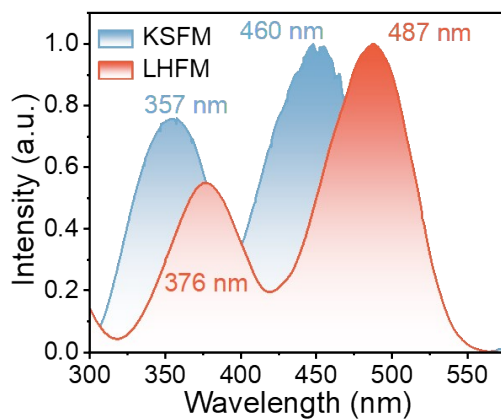

**Figure S9.** Comparison of excitation peak normalization between LHF and KSFM.

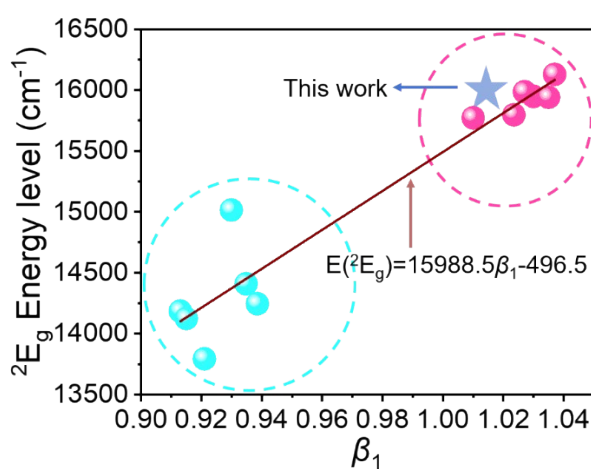

**Figure S10.** Linear energy relationship between  ${}^2E_g \rightarrow {}^4A_{2g}$  of octahedral center  $Mn^{4+}$  and  $\beta_1$ .

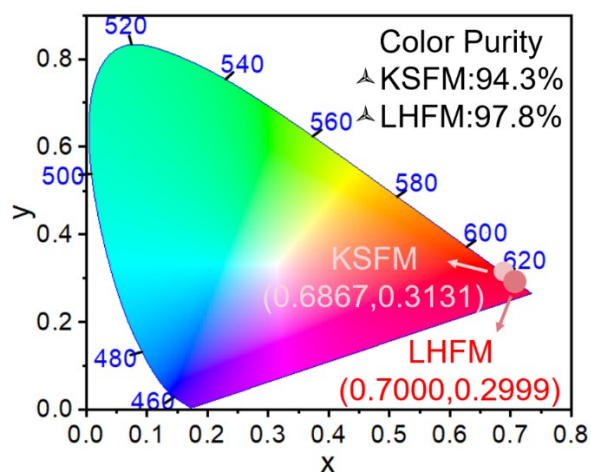

**Figure S11.** CIE chromaticity diagrams of LHF and KSFM.

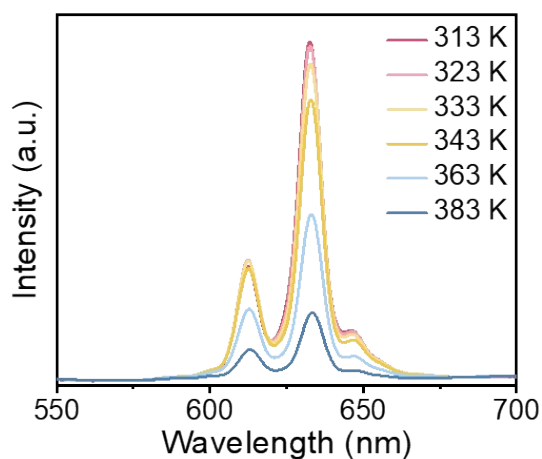

**Figure S12.** Thermal stability spectrum of LHFMs.

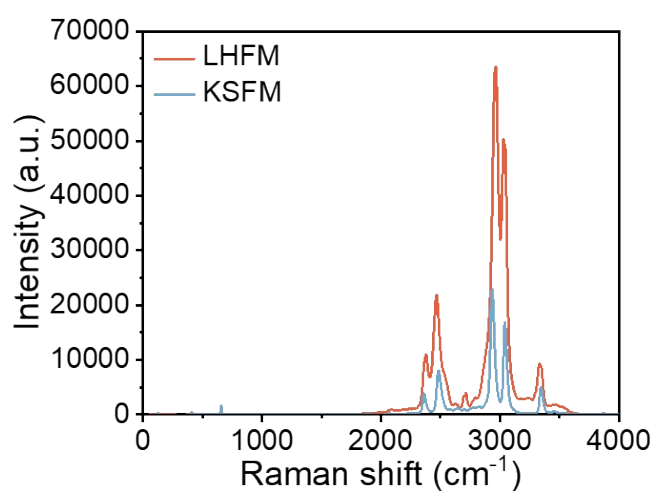

**Figure S13.** Raman comparison diagrams of LHFMs and KSFMs.

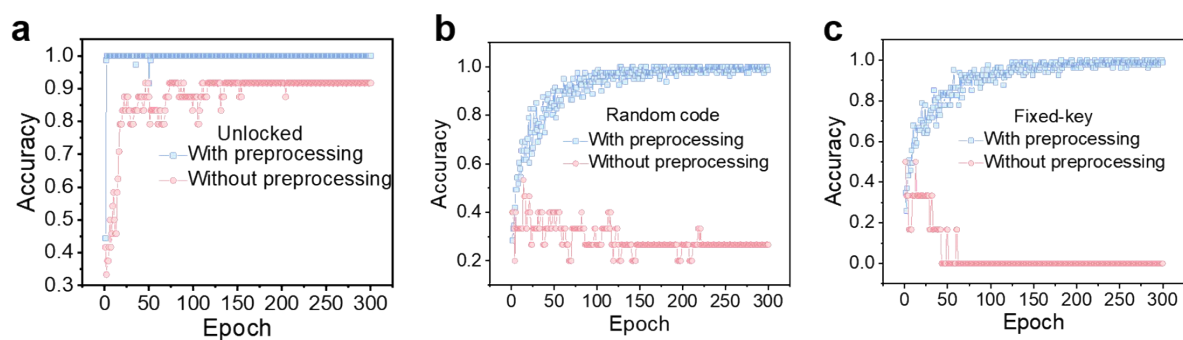

**Figure S14.** Recognition accuracy under different conditions as a function of training time.

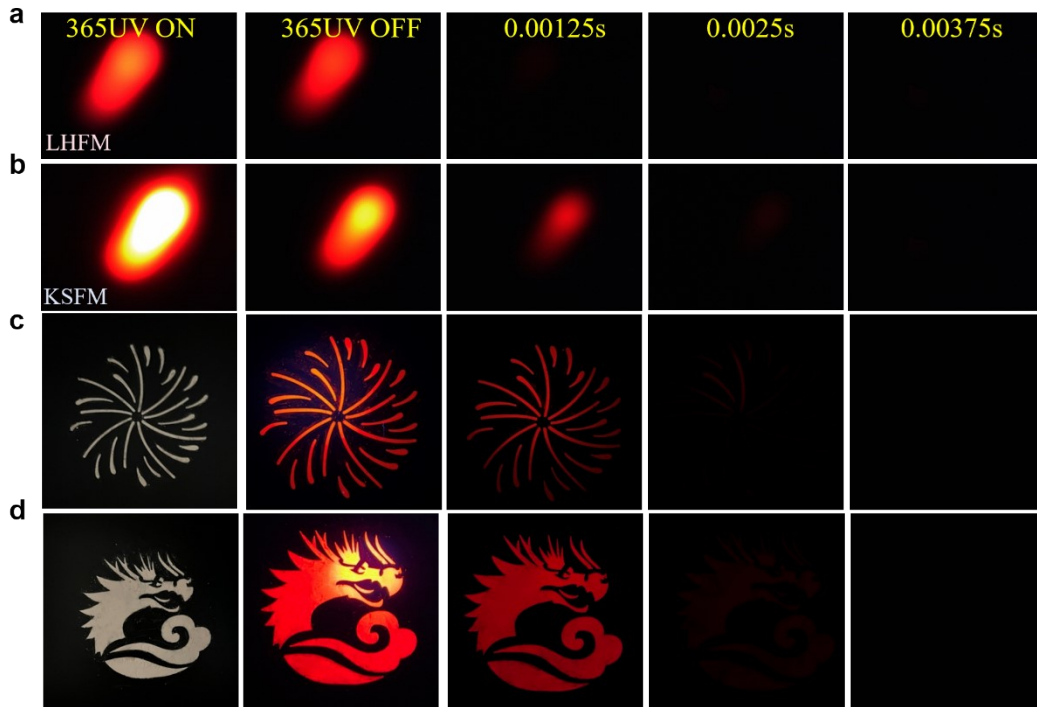

**Figure S15.** Color comparison of LHFMs and KSFM as a function of decay time.

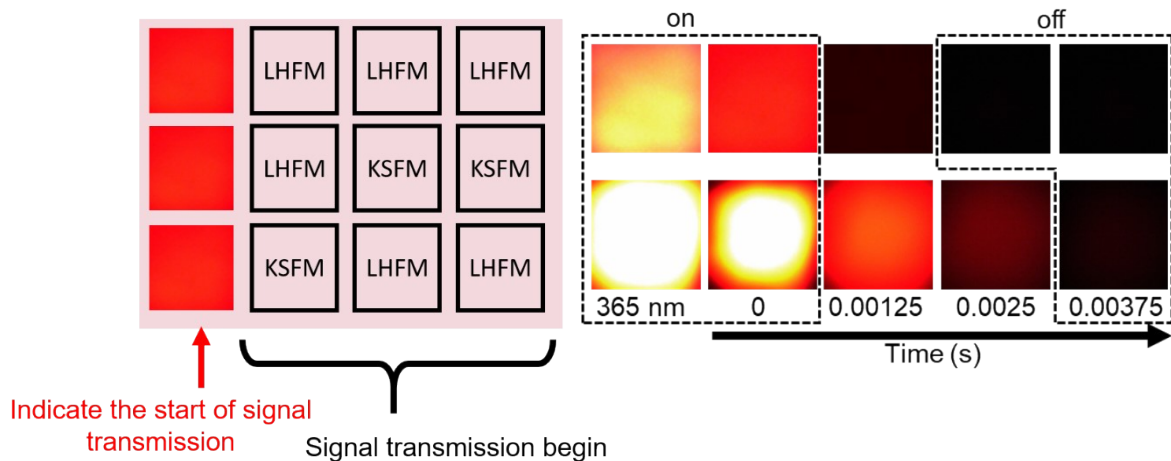

**Figure S16.** Anti-counterfeiting application of LHFMs.

**Table S1.**Refined crystallographic data of  $\text{Li}_2\text{HfF}_6:x\text{Mn}^{4+}$  ( $x = 0.06-0.10$ ).

| Chemical formula           | $\text{Li}_2\text{HfF}_6:0.06\text{Mn}^{4+}$ | $\text{Li}_2\text{HfF}_6:0.07\text{Mn}^{4+}$ | $\text{Li}_2\text{HfF}_6:0.08\text{Mn}^{4+}$ | $\text{Li}_2\text{HfF}_6:0.09\text{Mn}^{4+}$ | $\text{Li}_2\text{HfF}_6:0.10\text{Mn}^{4+}$ |
|----------------------------|----------------------------------------------|----------------------------------------------|----------------------------------------------|----------------------------------------------|----------------------------------------------|
| Space group                | <i>P-31m</i>                                 | <i>P-31m</i>                                 | <i>P-31m</i>                                 | <i>P-31m</i>                                 | <i>P-31m</i>                                 |
| <i>a</i> (Å)               | 4.96951                                      | 4.96937                                      | 4.96894                                      | 4.96902                                      | 4.9688                                       |
| <i>b</i> (Å)               | 4.96951                                      | 4.96937                                      | 4.96894                                      | 4.96902                                      | 4.9688                                       |
| <i>c</i> (Å)               | 4.64276                                      | 4.64289                                      | 4.6429                                       | 4.64191                                      | 4.64156                                      |
| $\alpha$ (deg)             | 90                                           | 90                                           | 90                                           | 90                                           | 90                                           |
| $\beta$ (deg)              | 90                                           | 90                                           | 90                                           | 90                                           | 90                                           |
| $\gamma$ (deg)             | 120                                          | 120                                          | 120                                          | 120                                          | 120                                          |
| <i>V</i> (Å <sup>3</sup> ) | 99.29647                                     | 99.29375                                     | 99.27693                                     | 99.2586                                      | 99.24243                                     |
| <i>R</i> <sub>wp</sub>     | 8.81%                                        | 7.52%                                        | 8.74%                                        | 9.14%                                        | 8.62%                                        |
| <i>R</i> <sub>p</sub>      | 8.42%                                        | 7.62%                                        | 7.42%                                        | 9.14%                                        | 7.74%                                        |
| $\chi^2$                   | 1.113                                        | 0.992                                        | 1.499                                        | 1.156                                        | 1.398                                        |

**Table S2.**

Spectroscopic parameters and  $\beta_1$  values of  $Mn^{4+}$  ions for as-reported  $Mn^{4+}$ -activated fluorides and oxides phosphor reported by other literature.

| Phosphors                      | $Dq/cm^{-1}$   | $B/cm^{-1}$   | $C/cm^{-1}$   | $\beta_1$   | $E(^2E_g)/cm^{-1}$ | Refs.            |
|--------------------------------|----------------|---------------|---------------|-------------|--------------------|------------------|
| $Na_2TiF_6$                    | 2100           | 504           | 4052          | 1.037       | 16129              | 1                |
| $K_2XF_7(X = Ta, Nb)$          | 2166           | 511           | 3955          | 1.03        | 15948              | 2                |
| $KZnF_7$                       | 2105           | 607           | 3785          | 1.0235      | 15797              | 3                |
| $(NH_4)_2NaInF_6$              | 2144           | 531           | 3874          | 1.01        | 15772              | 4                |
| $K_3MoO_3F_3$                  | 2127.7         | 575.43        | 3873          | 1.027       | 15986.3            | 5                |
| $K_2Na(MoO_2F_4)_2 \cdot H_2O$ | 2128           | 484           | 4075          | 1.035       | 15940              | 6                |
| $KGaP_2O_7$                    | 2204           | 782           | 2804          | 0.9385      | 14245              | 7                |
| $SrGd_2Al_2O_7$                | 2053           | 767           | 2762          | 0.921       | 13793              | 8                |
| $Gd_2ZnTiO_6$                  | 1980           | 639           | 3132          | 0.913       | 14184              | 9                |
| $Li_3Mg_2SbO_6$                | 2096           | 812           | 2634          | 0.9299      | 15015              | 10               |
| $La(MgTi)_{1/2}O_3$            | 2053           | 700           | 2959          | 0.915       | 14124              | 11               |
| $Sr_2LaNbO_6$                  | 2101           | 722           | 3001          | 0.9348      | 14409              | 12               |
| <b><math>Li_2HfF_6</math></b>  | <b>2053.38</b> | <b>563.65</b> | <b>3092.5</b> | <b>1.01</b> | <b>15797.79</b>    | <b>This work</b> |

**Table S3.**  
KSFM and LHFM attenuation fitting parameters.

| Parameter                  | LHFM    | KSFM    |
|----------------------------|---------|---------|
| $A_1$                      | 0.2068  | 0.33448 |
| $\tau_1$ ( $\mu\text{s}$ ) | 896     | 9073    |
| $A_2$                      | 0.86994 | 0.60211 |
| $\tau_2$ ( $\mu\text{s}$ ) | 3032    | 9074    |

The fast and slow decay components can be attributed to two distinct relaxation pathways of  $\text{Mn}^{4+}$  within the coupled excited-state system. The slow component ( $\tau_2$ ) predominantly originates from the spin-forbidden  ${}^2E_g \rightarrow {}^4A_{2g}$  transition, which is characteristic of  $\text{Mn}^{4+}$  in relatively symmetric octahedral environments and is associated with a low radiative transition probability. In contrast, the fast component ( $\tau_1$ ) mainly arises from a coupling-assisted relaxation pathway involving the  ${}^2E_g$  and  ${}^4T_{2g}$  states. Thermally assisted interaction between these states facilitates population redistribution within the excited-state manifold, effectively increasing the contribution of states with higher radiative transition probability and resulting in a shortened decay component.

## References

1. Y. Liu, T. Wang, Z. Tan, J. Meng, W. Huang, Y. Huang, S. Liao and H. Zhang, *Ceram. Int.*, 2019, **45**, 6243-6249.
2. H. Lin, T. Hu, Q. Huang, Y. Cheng, B. Wang, J. Xu, J. Wang and Y. Wang, *Laser Photonics Rev.*, 2017, **11**, 1700148.
3. T. Hu, H. Lin, F. Lin, Y. Gao, Y. Cheng, J. Xu and Y. Wang, *J. Mater. Chem. C*, 2018, **6**, 10845-10854.
4. H. Wang, X. Liu, F. Hong, Y. Dong, Y. Li, G. Liu, J. Wang, D. Li, W. Yu and X. Dong, *J. Lumin.*, 2022, **251**, 119242.
5. J. Zhang, Q. He, D. Gao, M. Liu, J. Peng and X. Ye, *J. Mol. Struct.*, 2025, **1338**, 142317.
6. Q. Qu, H. Zhang and H. Ji, *J. Mater. Chem. C*, 2024, **12**, 5488-5495.
7. N. V. Naresh and N. Lee, *J. Lumin.*, 2019, **214**, 116565.
8. J. Xiao, J. Zhang, C. Tu, J. Liao, H. Wen and G. Gong, *Opt. Mater.*, 2021, **118**, 111219.
9. H. Chen, H. Lin, Q. Huang, F. Huang, J. Xu, B. Wang, Z. Lin, J. Zhou and Y. Wang, *J. Mater. Chem. C*, 2016, **4**, 2374-2381.
10. J. Zhong, X. Chen, D. Chen, M. Liu, Y. Zhu, X. Li and Z. Ji, *J. Alloys Compd.*, 2019, **773**, 413-422.
11. Z. Zhou, J. Zheng, R. Shi, N. Zhang, J. Chen, R. Zhang, H. Suo, E. M. Goldys and C. Guo, *ACS Appl. Mater. Interfaces*, 2017, **9**, 6177-6185.
12. A. Fu, A. Guan, D. Yu, S. Xia, F. Gao, X. Zhang, L. Zhou, Y. Li and R. Li, *Mater. Res. Bull.*, 2017, **88**, 258-265.
